# Supplementary material
Source: Research Square preprint supplement (doi:10.21203/rs.3.rs-8988269/v1)
Supplement: Supplementary file 1 [file 7dd91cd14064cb9d875e2eb6.docx]

**Supplementary Table 1: Candidate Regulatory Elements and Epigenomic Data across Different Cell Lines (ENCODE Data).**

|  | GM12878 | HepG2 | K562 | HeLaS3 | HCT116 |
| --- | --- | --- | --- | --- | --- |
| cCRE | [SCREEN: Search Candidate Regulatory Elements by ENCODE](https://screen.encodeproject.org/) | | | | |
| CTCF | ENCFF644EEX | ENCFF841SRT | ENCFF682MFJ | ENCFF179RSE | ENCFF388PVO |
| DNase | ENCFF960FMM  ENCFF428XFI | ENCFF113VII  ENCFF546MZK | ENCFF414OGC  ENCFF338LXW | ENCFF757GHL  ENCFF660ZUF  ENCFF194NJI  ENCFF949GHX | ENCFF906MKW  ENCFF431JDU |
| EP300 | ENCFF545BXW | ENCFF705FOY | ENCFF198BYC | ENCFF541JEL | - |
| H2AFZ | ENCFF935EGN | ENCFF253PND | ENCFF621DJP | ENCFF441QMQ | ENCFF863EHT |
| H3K27ac | ENCFF469WVA | ENCFF022TZG | ENCFF381NDD | ENCFF658XKZ | ENCFF169MCH |
| H3K27me3 | ENCFF919DOR | ENCFF437XHN | ENCFF139KZL | ENCFF094TNZ | ENCFF717ZKL |
| H3K36me3 | ENCFF380LZI | ENCFF247LOP | ENCFF347YYH | ENCFF157RUQ | ENCFF540FPB |
| H3K4me1 | ENCFF564KBE | ENCFF576YVM | ENCFF607SUJ | ENCFF860GGZ | ENCFF337BPL |
| H3K4me2 | ENCFF627OKN | ENCFF057BKO | ENCFF959YJV | ENCFF648MSR | ENCFF693HVA |
| H3K4me3 | ENCFF287HAO | ENCFF500VAH | ENCFF911JVK | ENCFF460QIU | ENCFF649ZLF |
| H3K79me2 | ENCFF931USZ | ENCFF655XBP | ENCFF544AVW | ENCFF523XAV | ENCFF631DLM |
| H3K9ac | ENCFF599TRR | ENCFF040RHK | ENCFF286WRJ | ENCFF601MHG | ENCFF743PJP |
| H3K9me3 | ENCFF683HCZ | ENCFF754ROM | ENCFF601JGK | ENCFF658AOG | ENCFF254TIW |
| H4K20me1 | ENCFF479XIQ | ENCFF330AIV | ENCFF605FAF | ENCFF116YMZ | ENCFF349NQI |
| POLR2A | ENCFF200WHZ | ENCFF761IJZ | ENCFF806LCJ | ENCFF193YCT | ENCFF802CGI |
| POLR2AphosphoS5 | ENCFF559YIO | ENCFF801BXZ | ENCFF907FLD | ENCFF738UXP | ENCFF855XPI |
| Hi-C | ENCFF256UOW | ENCFF306VTV | ENCFF616PUW | 4DNFIBY3UHJB | 4DNFIXB4O92R |
| polyA plus RNA-seq | ENCFF783CHM  ENCFF485OUK  ENCFF673WNZ  ENCFF741PAY | ENCFF977QAI  ENCFF642NRP  ENCFF416RHJ  ENCFF938LTW | ENCFF741NSE  ENCFF752DDP  ENCFF337XTV  ENCFF173RJM | ENCFF798WQM  ENCFF975NGG  ENCFF364YCB  ENCFF008ARC | ENCFF654QMA  ENCFF003PGO  ENCFF651GQO  ENCFF964VPA |


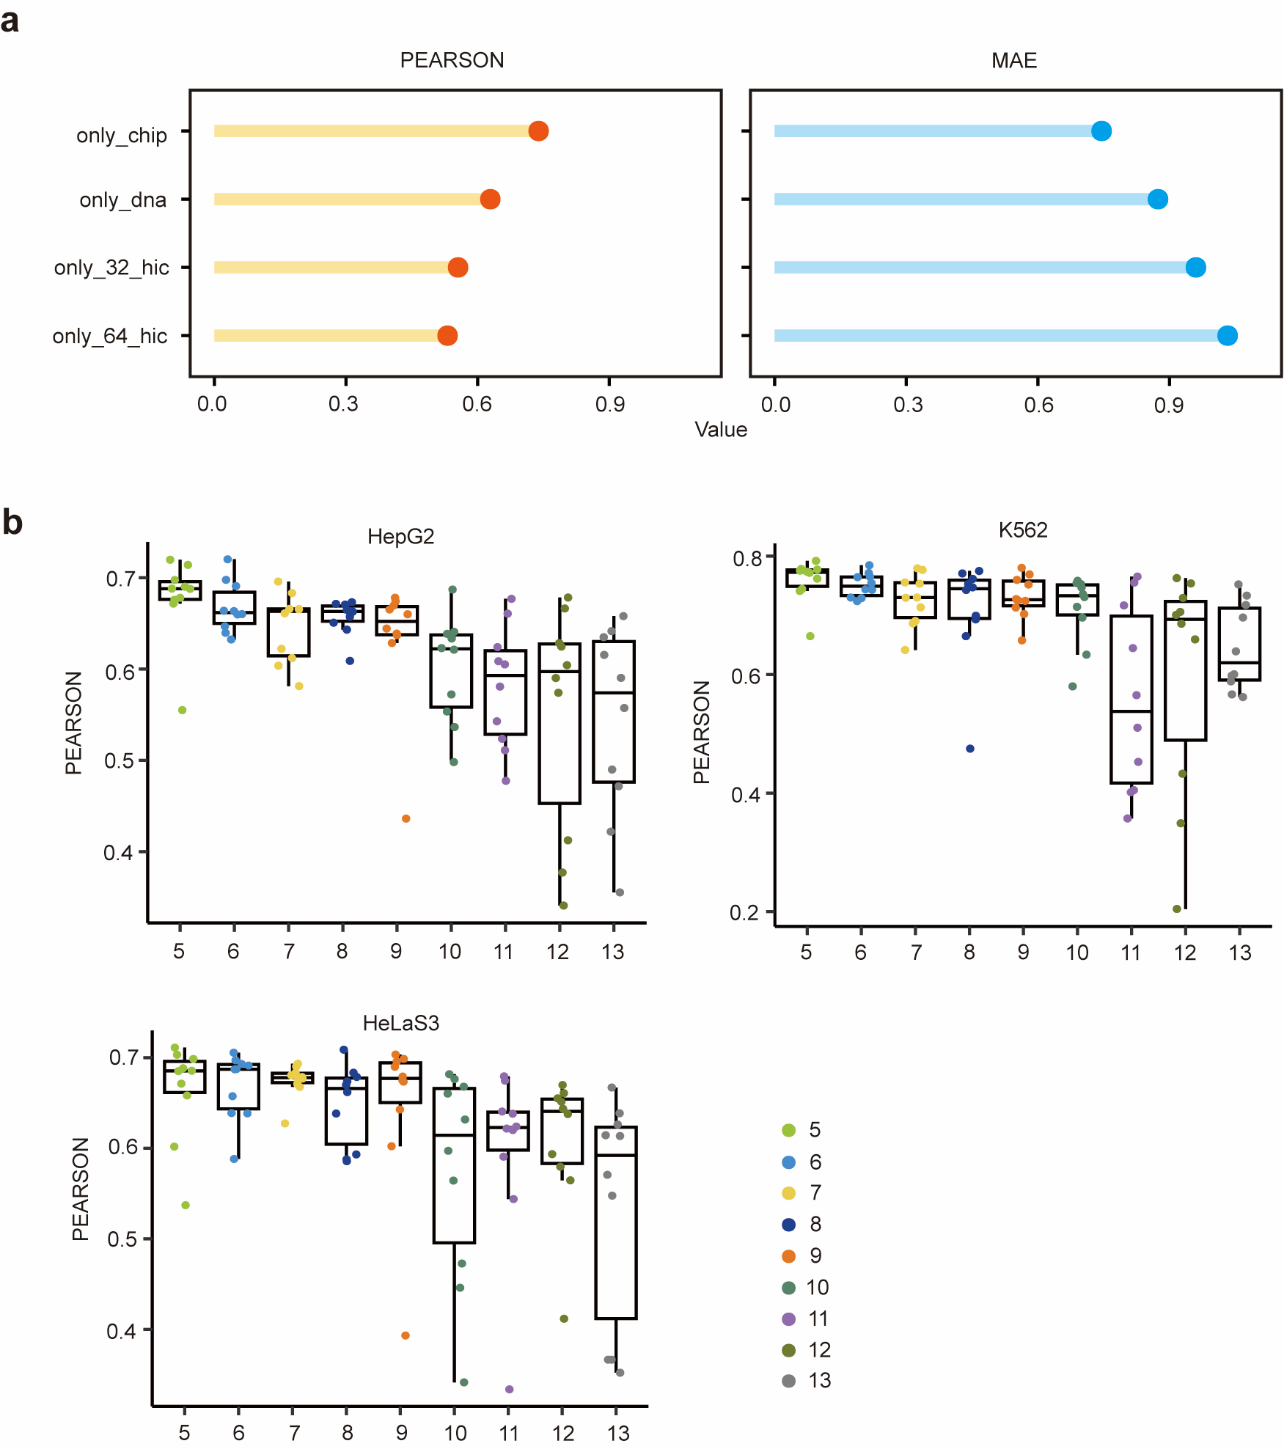


**Supplementary Fig. S1 |** **Robustness of DeepCis in gene expression prediction**. **a** Prediction results on chromosome 6 of the test set across four cell lines using single omics data. *only_chip* represents the use of only epigenomic data, *only_dna* represents the use of only genomic data, *only_32_hic* represents the use of only 3D genomic data with a dimensionality reduction to 32 for each cCRE, and *only_64_hic* represents the use of only 3D genomic data with a dimensionality reduction to 64 for each cCRE. **b** Robustness evaluation of the model in HepG2, K562, and HeLaS3 cell lines after randomly removing a subset of epigenomic features (removal range: 5-13 features, iterated 10 times) and assessing performance using the Pearson correlation.


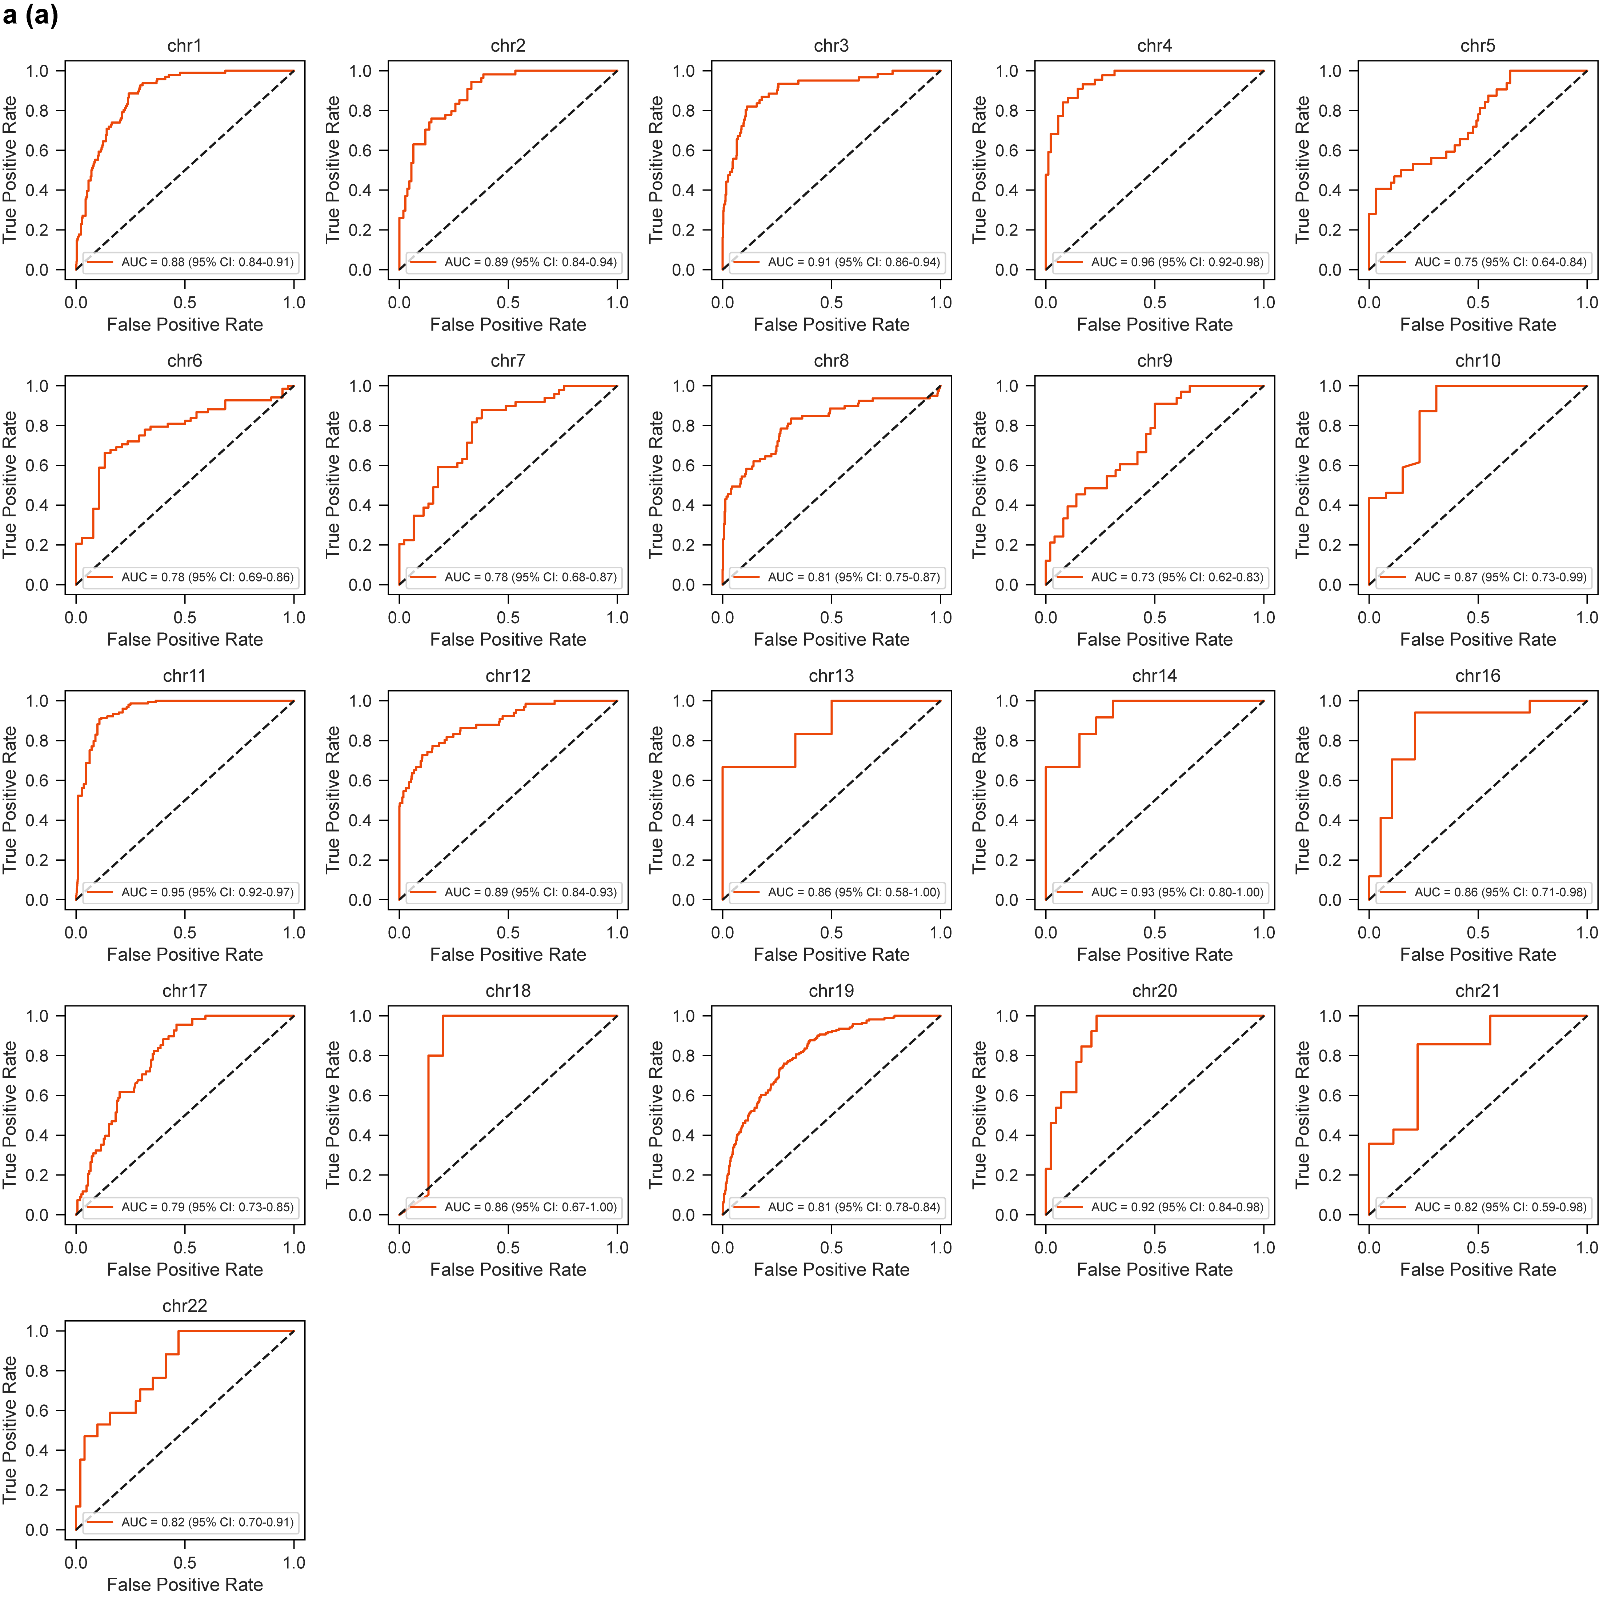


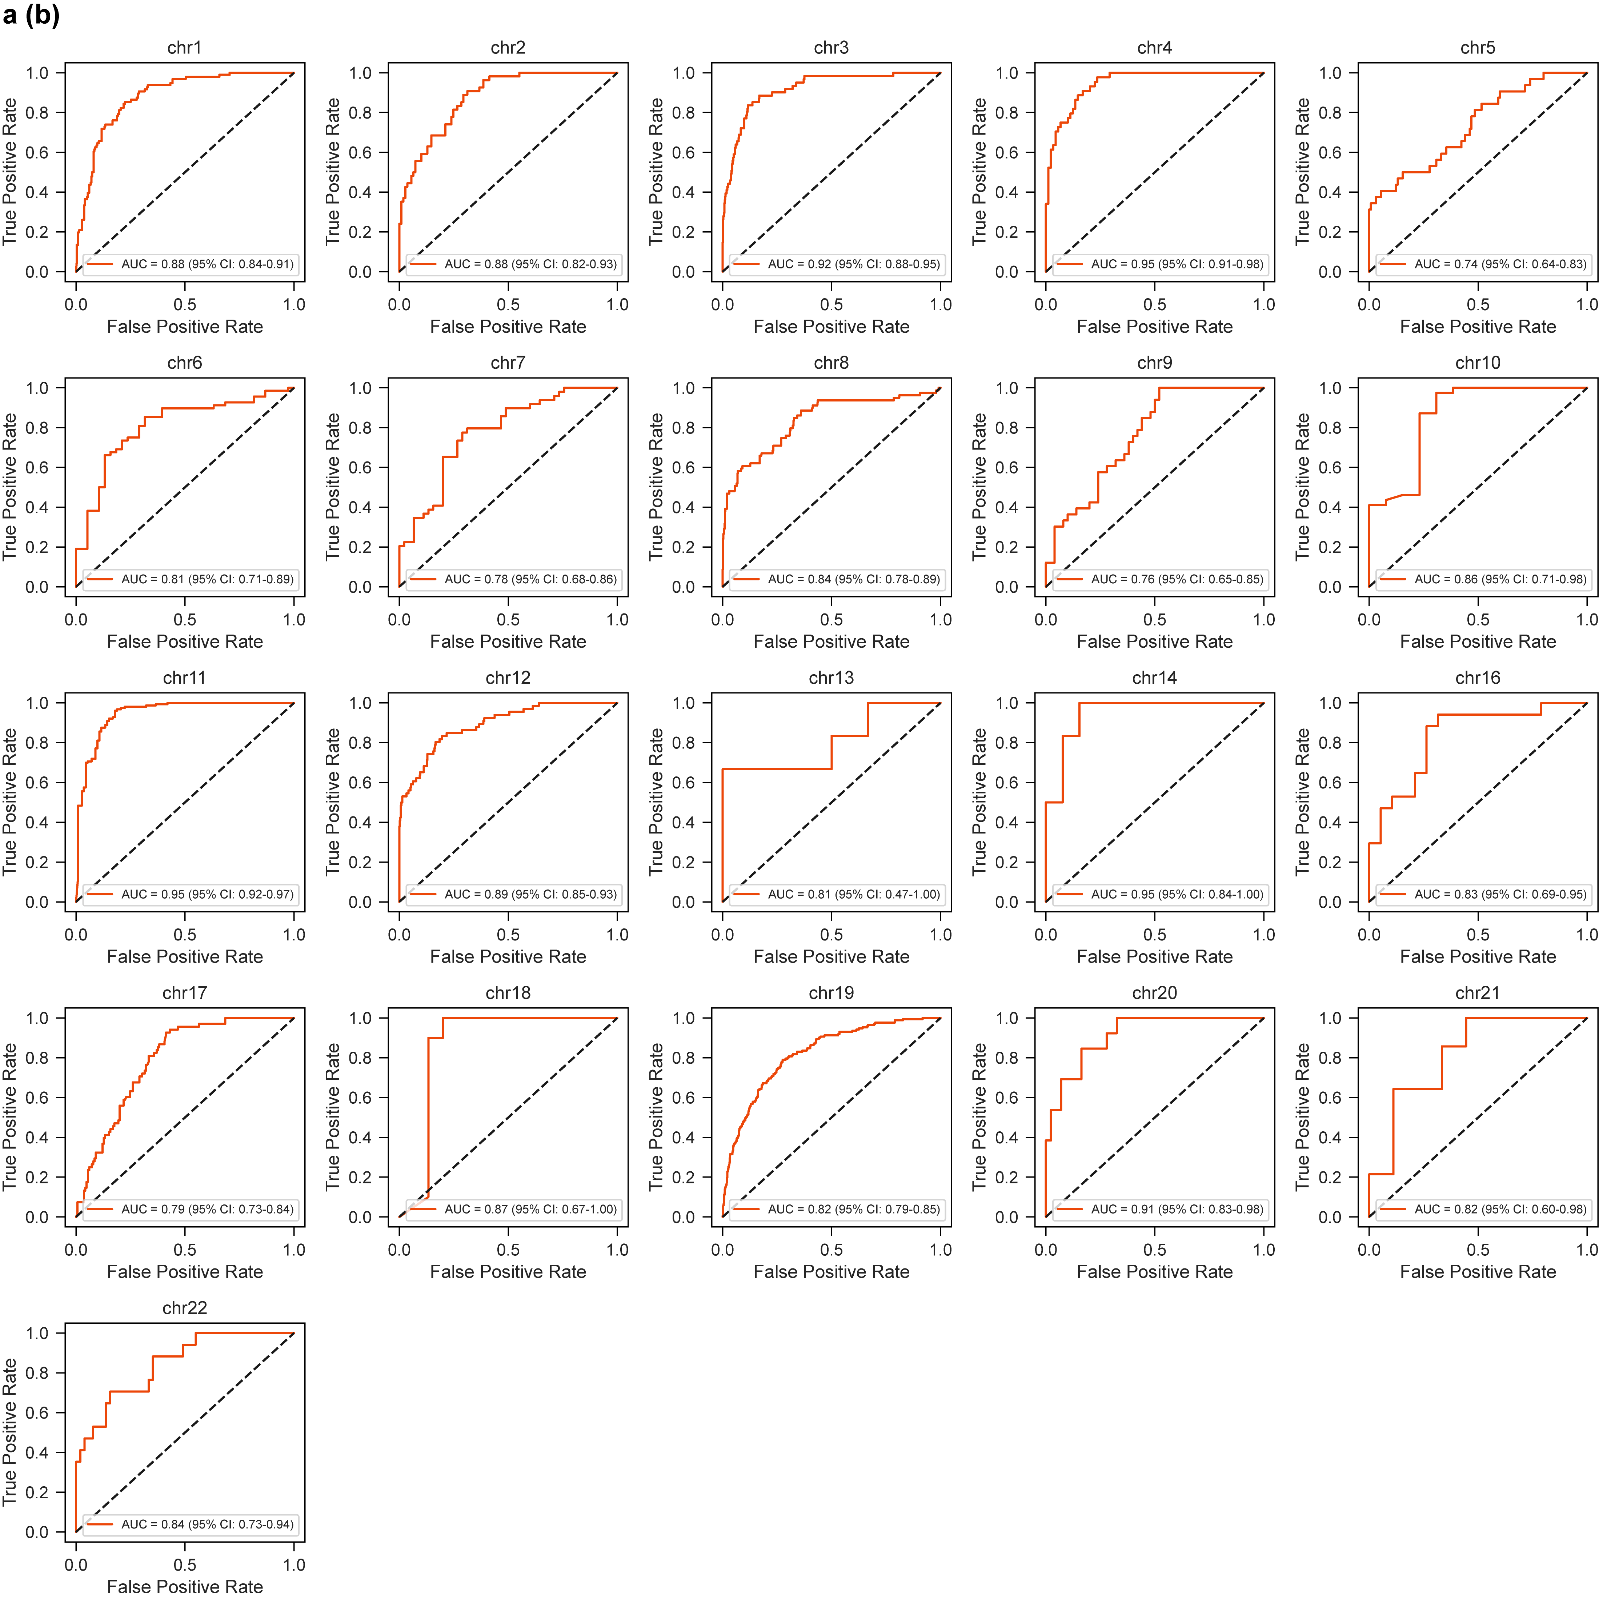


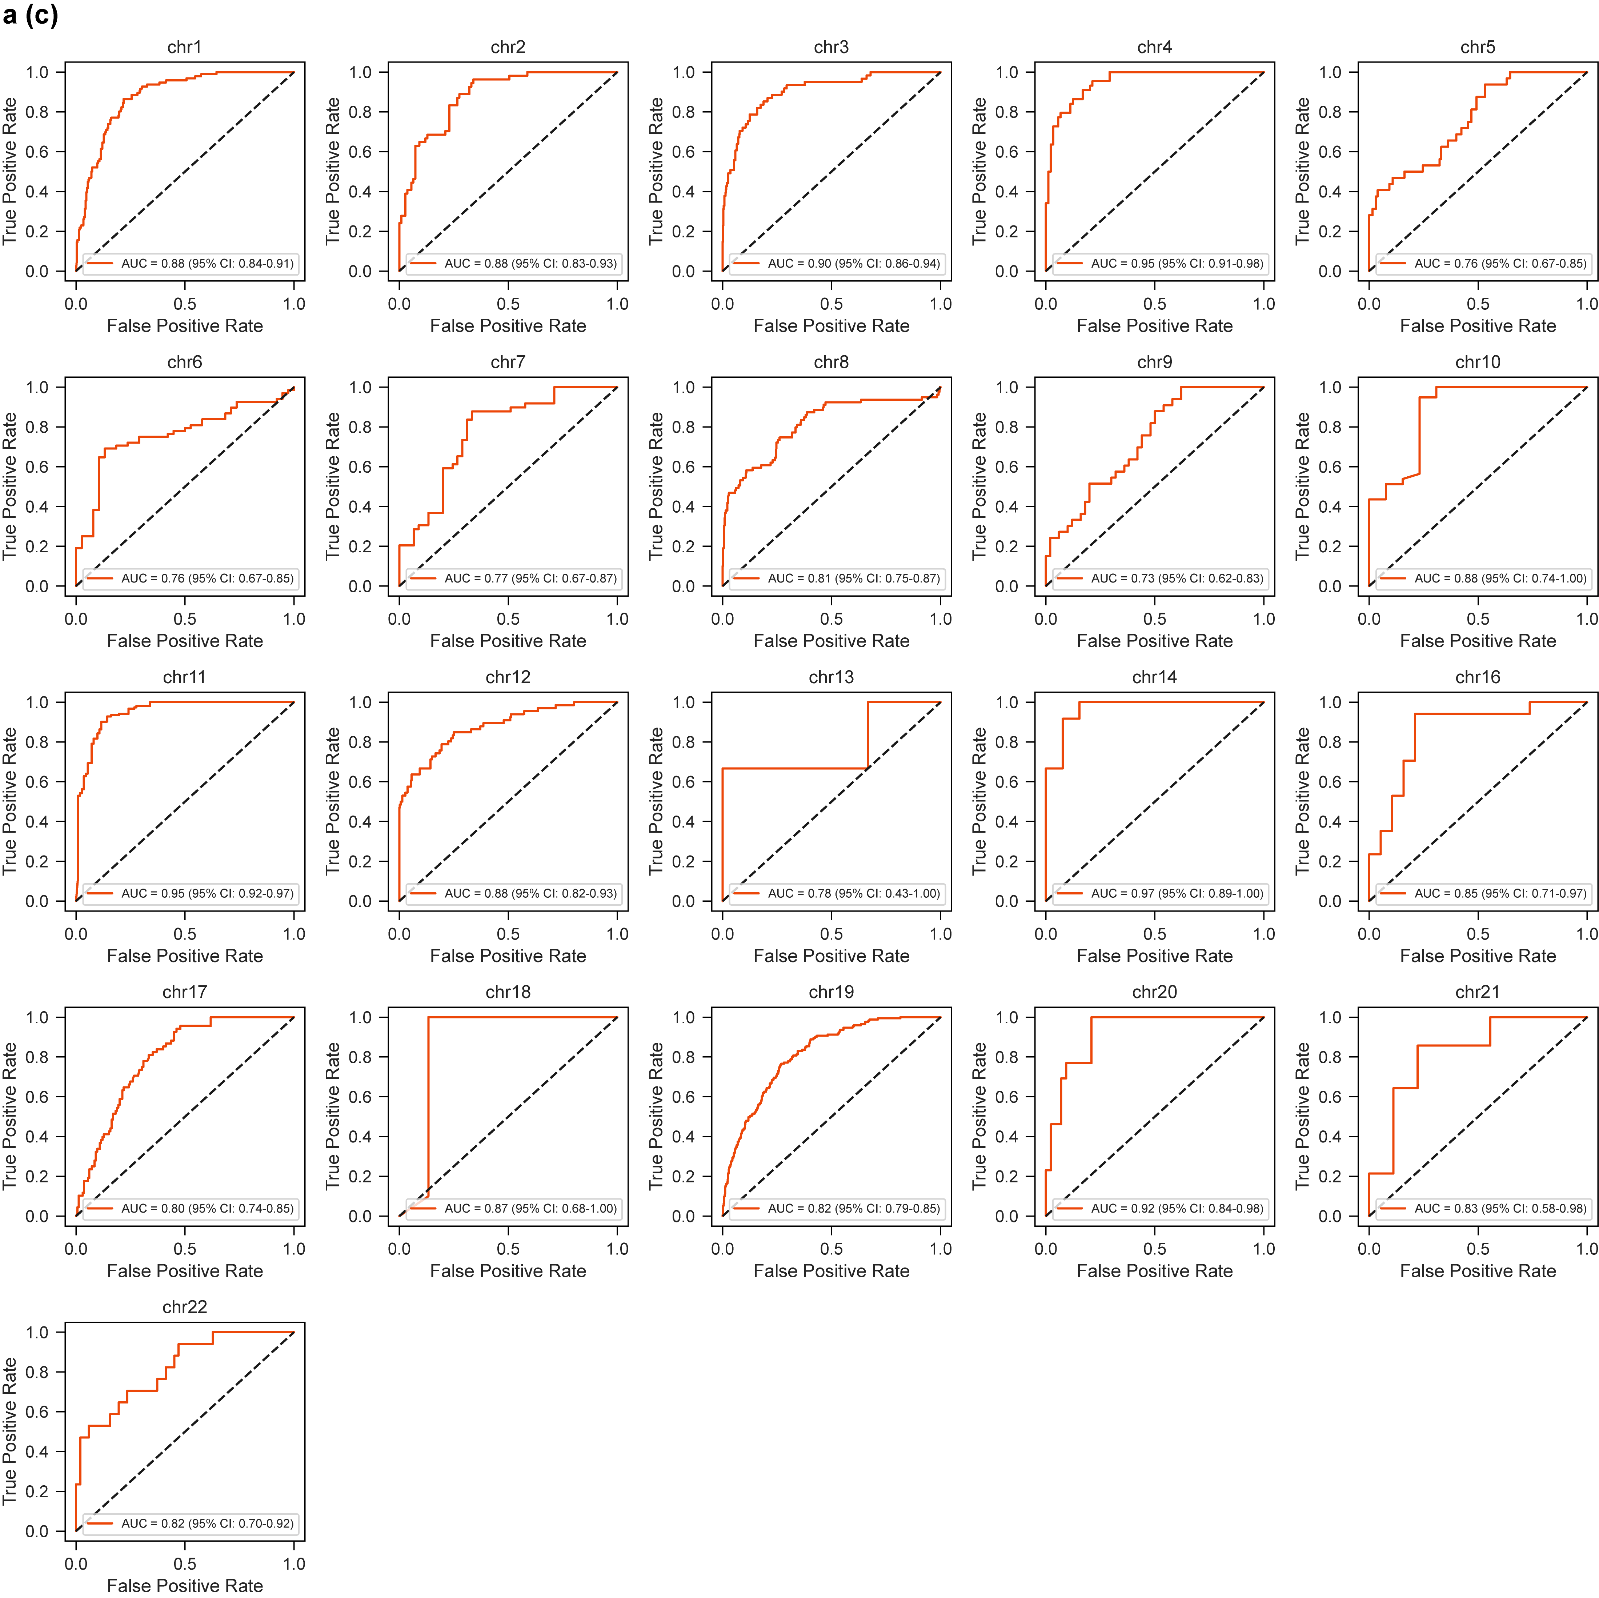


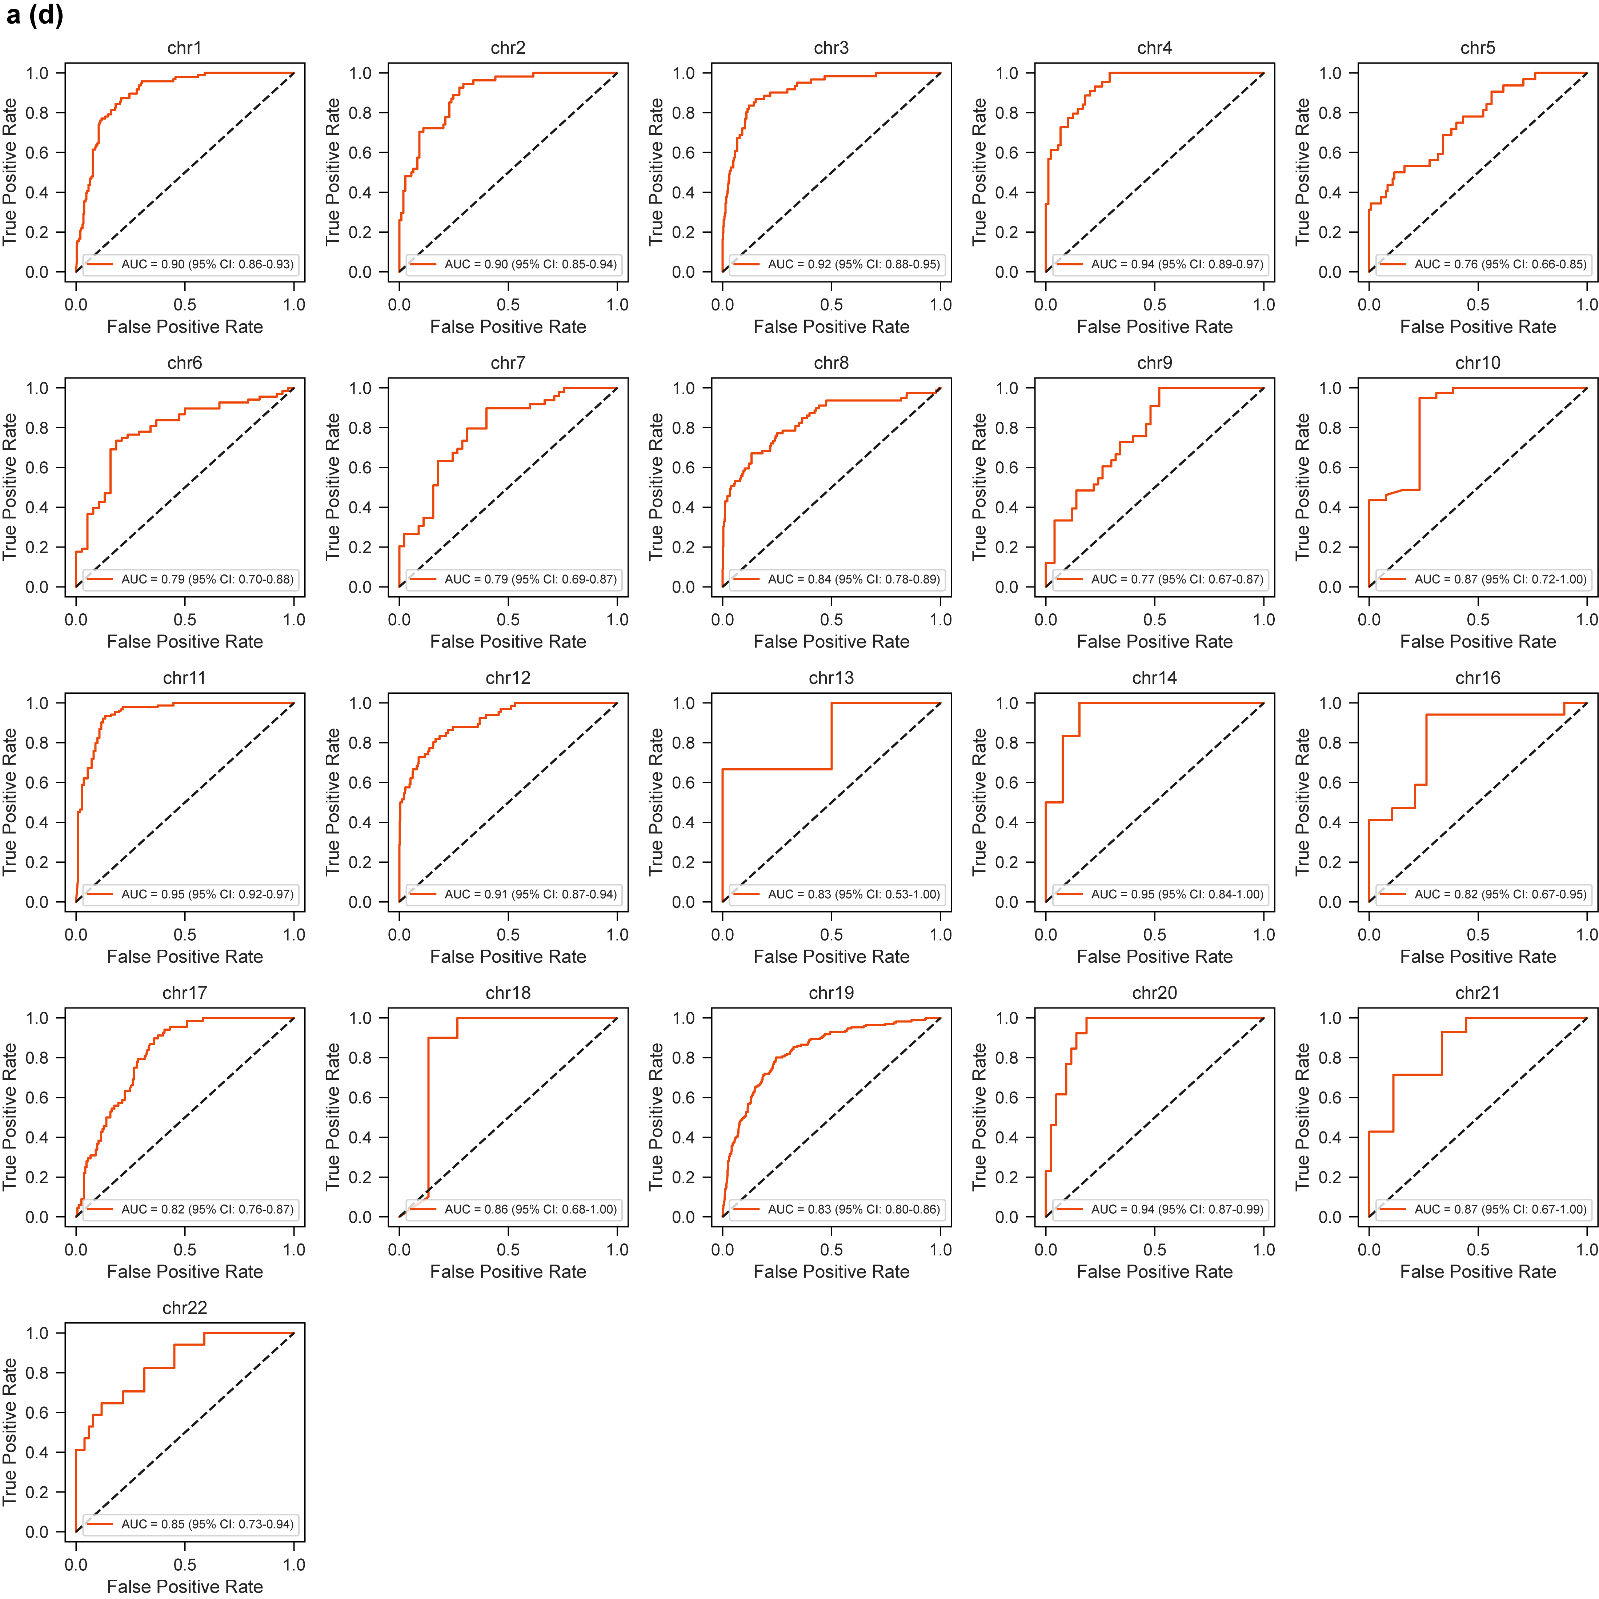


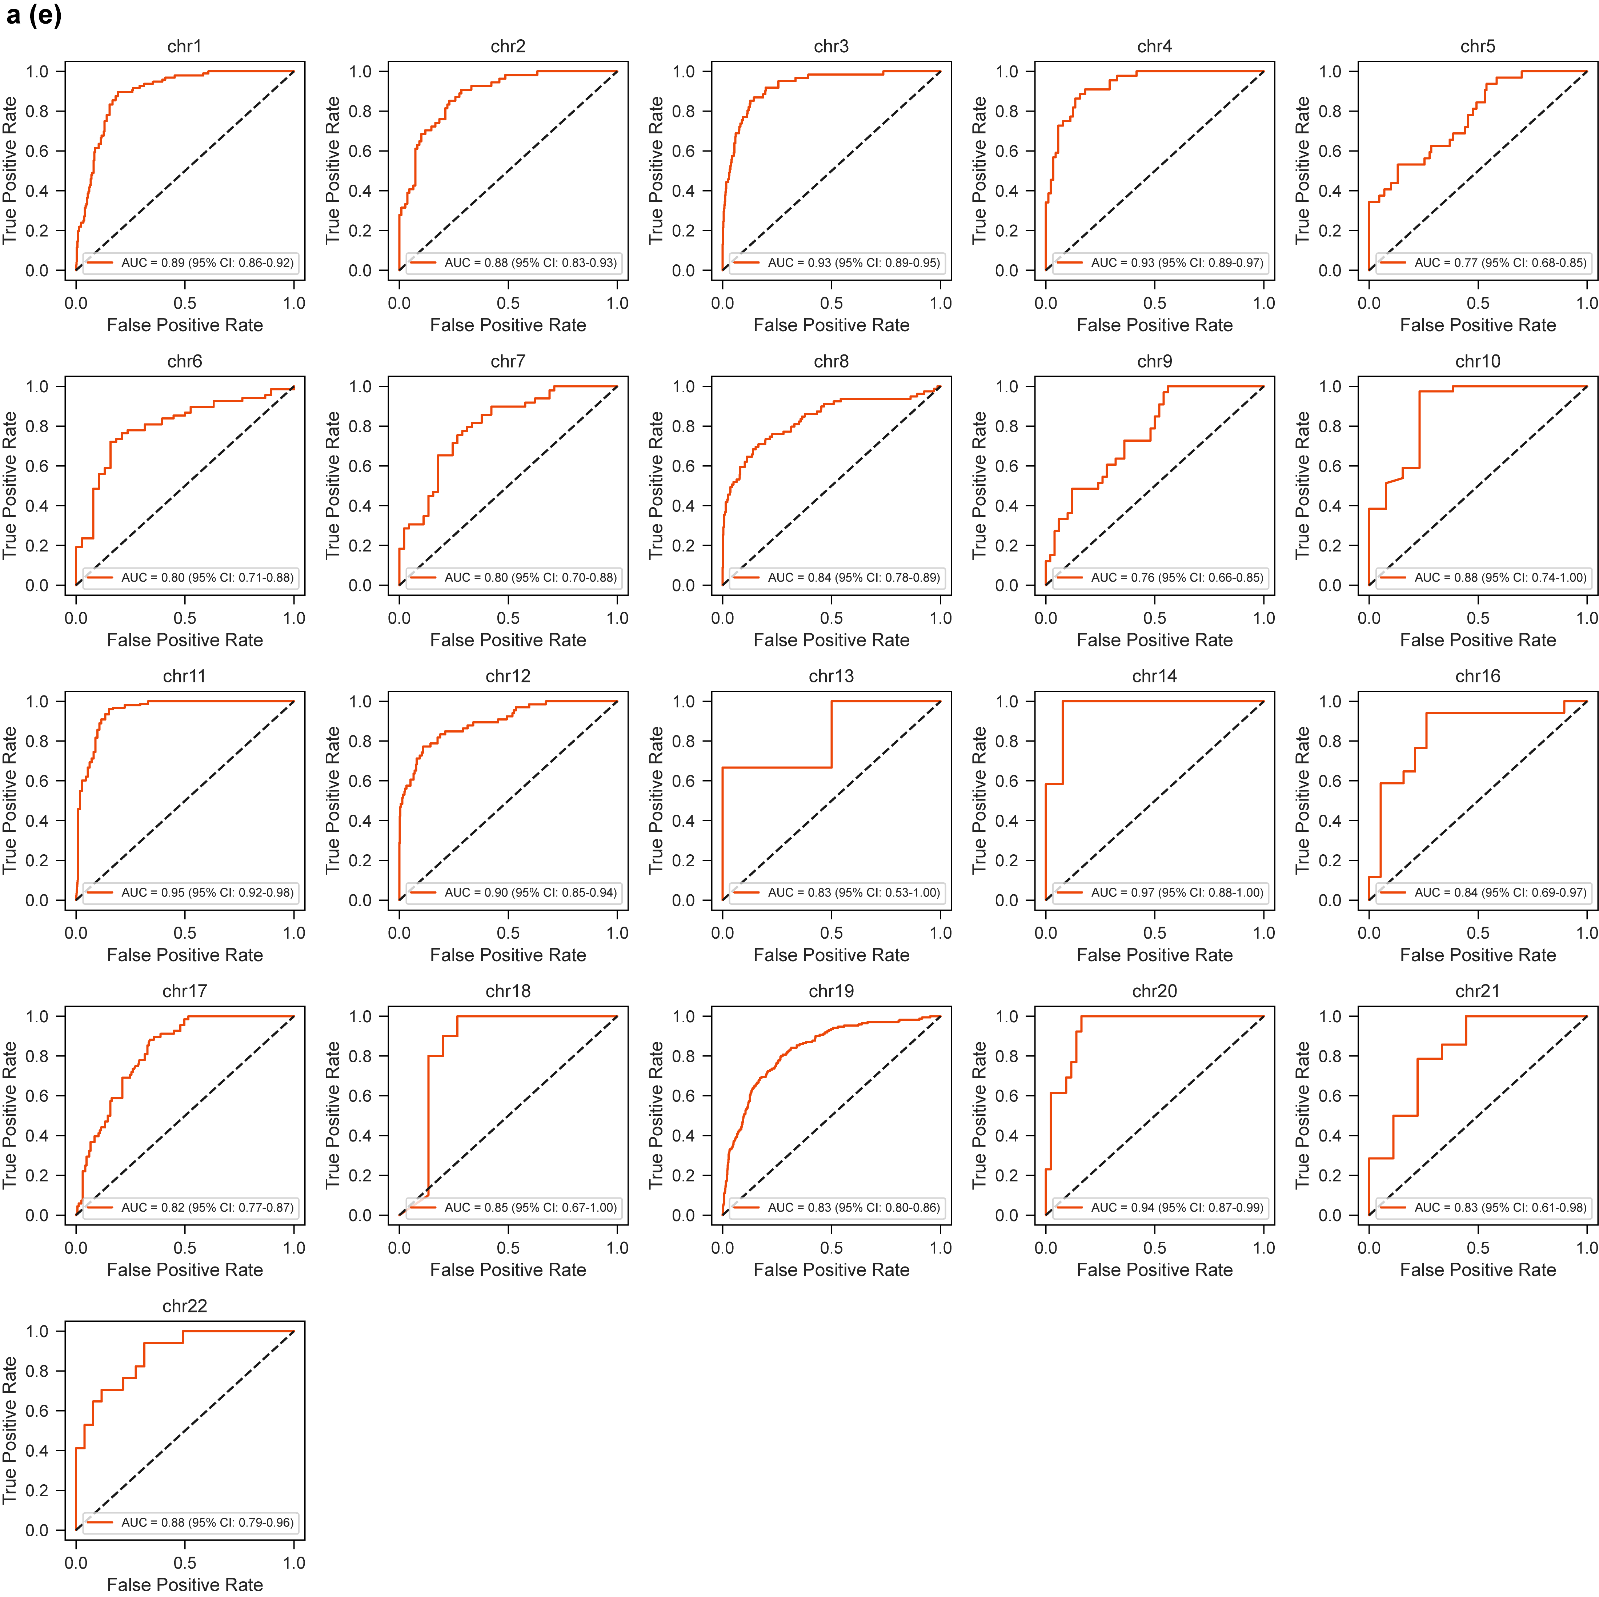


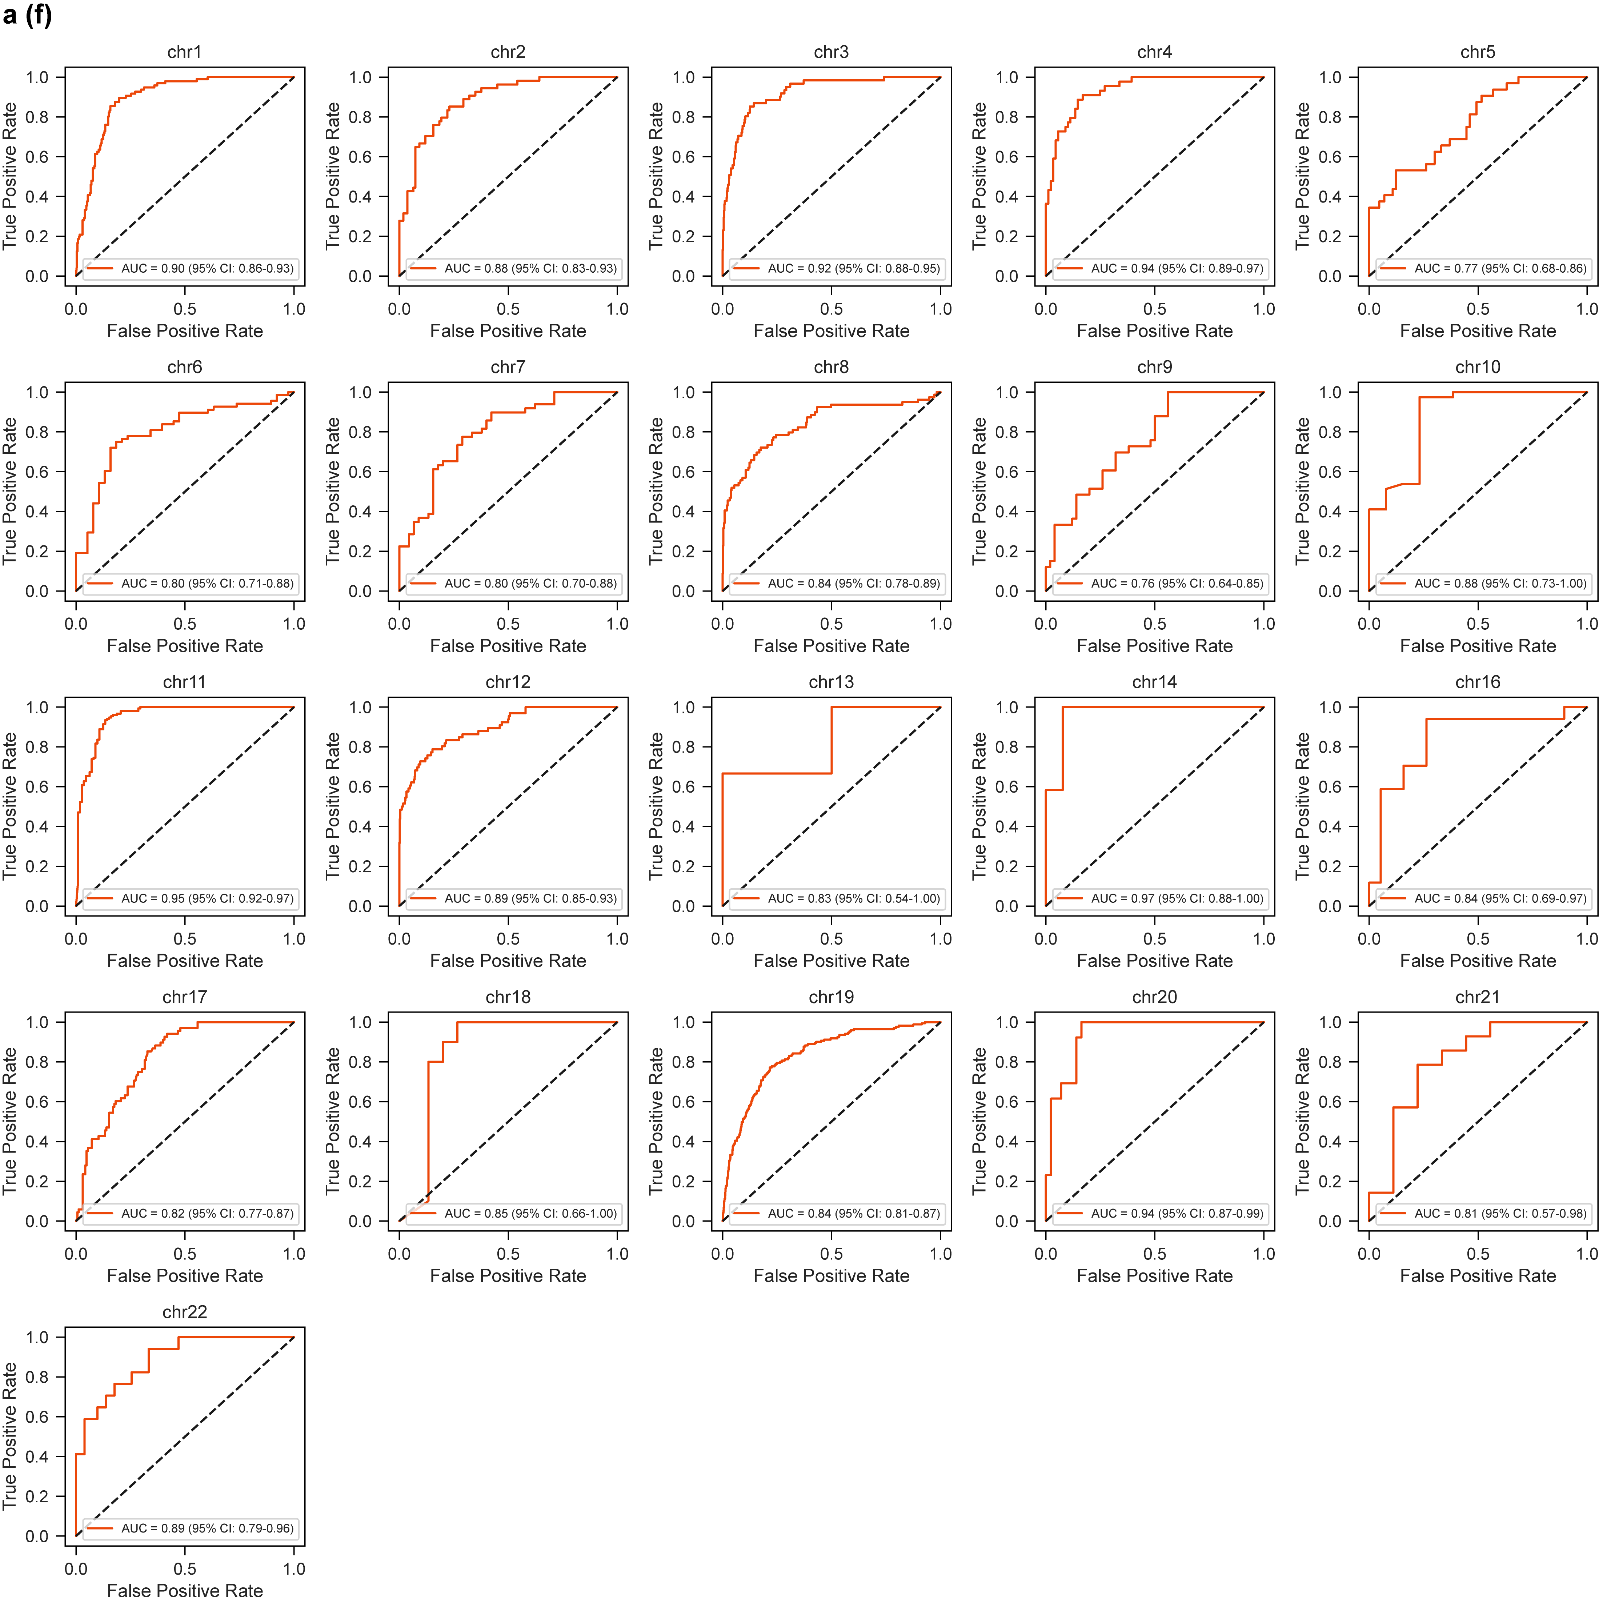


**Supplementary Fig. S2 | Quantification and identification of key cCREs by DeepCis.** | **a (a)-(f)** AUC performance of the model on each chromosome of the experimentally validated K562 enhancer data when retaining genomic features, selected epigenomic features, and 3D genomic spatial features. **(a)** Using all epigenomic features. **(b)** Using 2 epigenomic features (H3K79me2, POLR2A). **(c)** Using 3 epigenomic features (Dnase, H3K79me2, POLR2A). **(d)** Using 4 epigenomic features (Dnase, H2AFZ, H3K79me2, POLR2A). **(e)** Using 5 epigenomic features (Dnase, H2AFZ, H3K79me2, H4K20me1, POLR2A). **(f)** Using 6 epigenomic features (H2AFZ, H3K36me3, H3K4me1, H3K4me3, H3K79me2, POLR2A). The selected epigenomic features were determined through exhaustive search, based on the highest correlation with gene expression prediction.


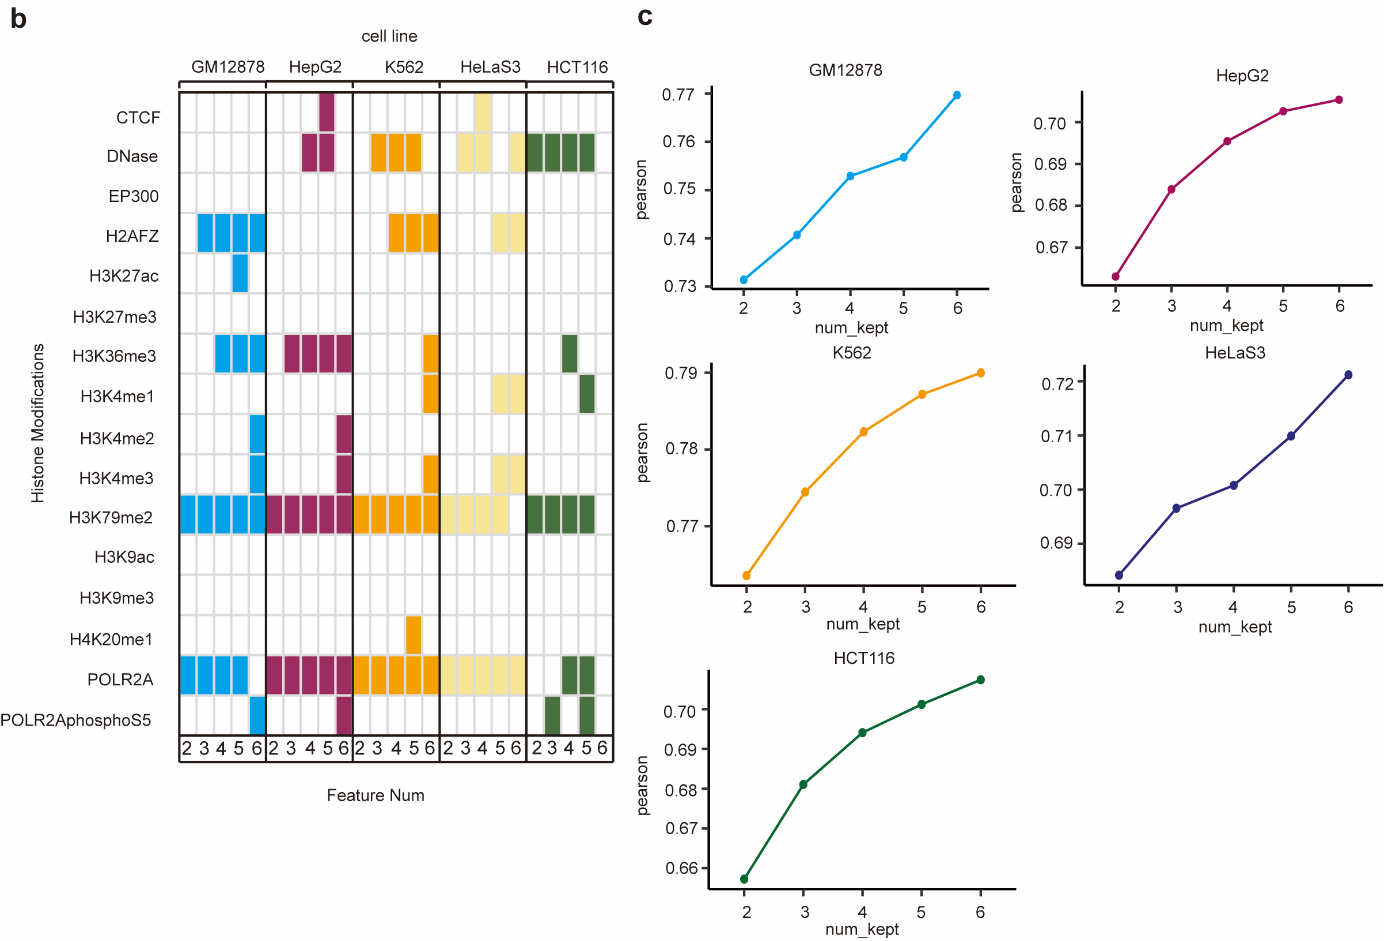


**Supplementary Fig. S2 | Quantification and identification of key cCREs by DeepCis** | **b** Epigenomic features corresponding to the maximum Pearson correlation coefficient when retaining 2-6 epigenomic features, genomic features, and 3D genomic spatial features for gene expression prediction in each cell line, as determined by exhaustive search. **c** Trend plots of the Pearson correlation coefficients corresponding to the retention of 2-6 epigenomic features in each cell line.


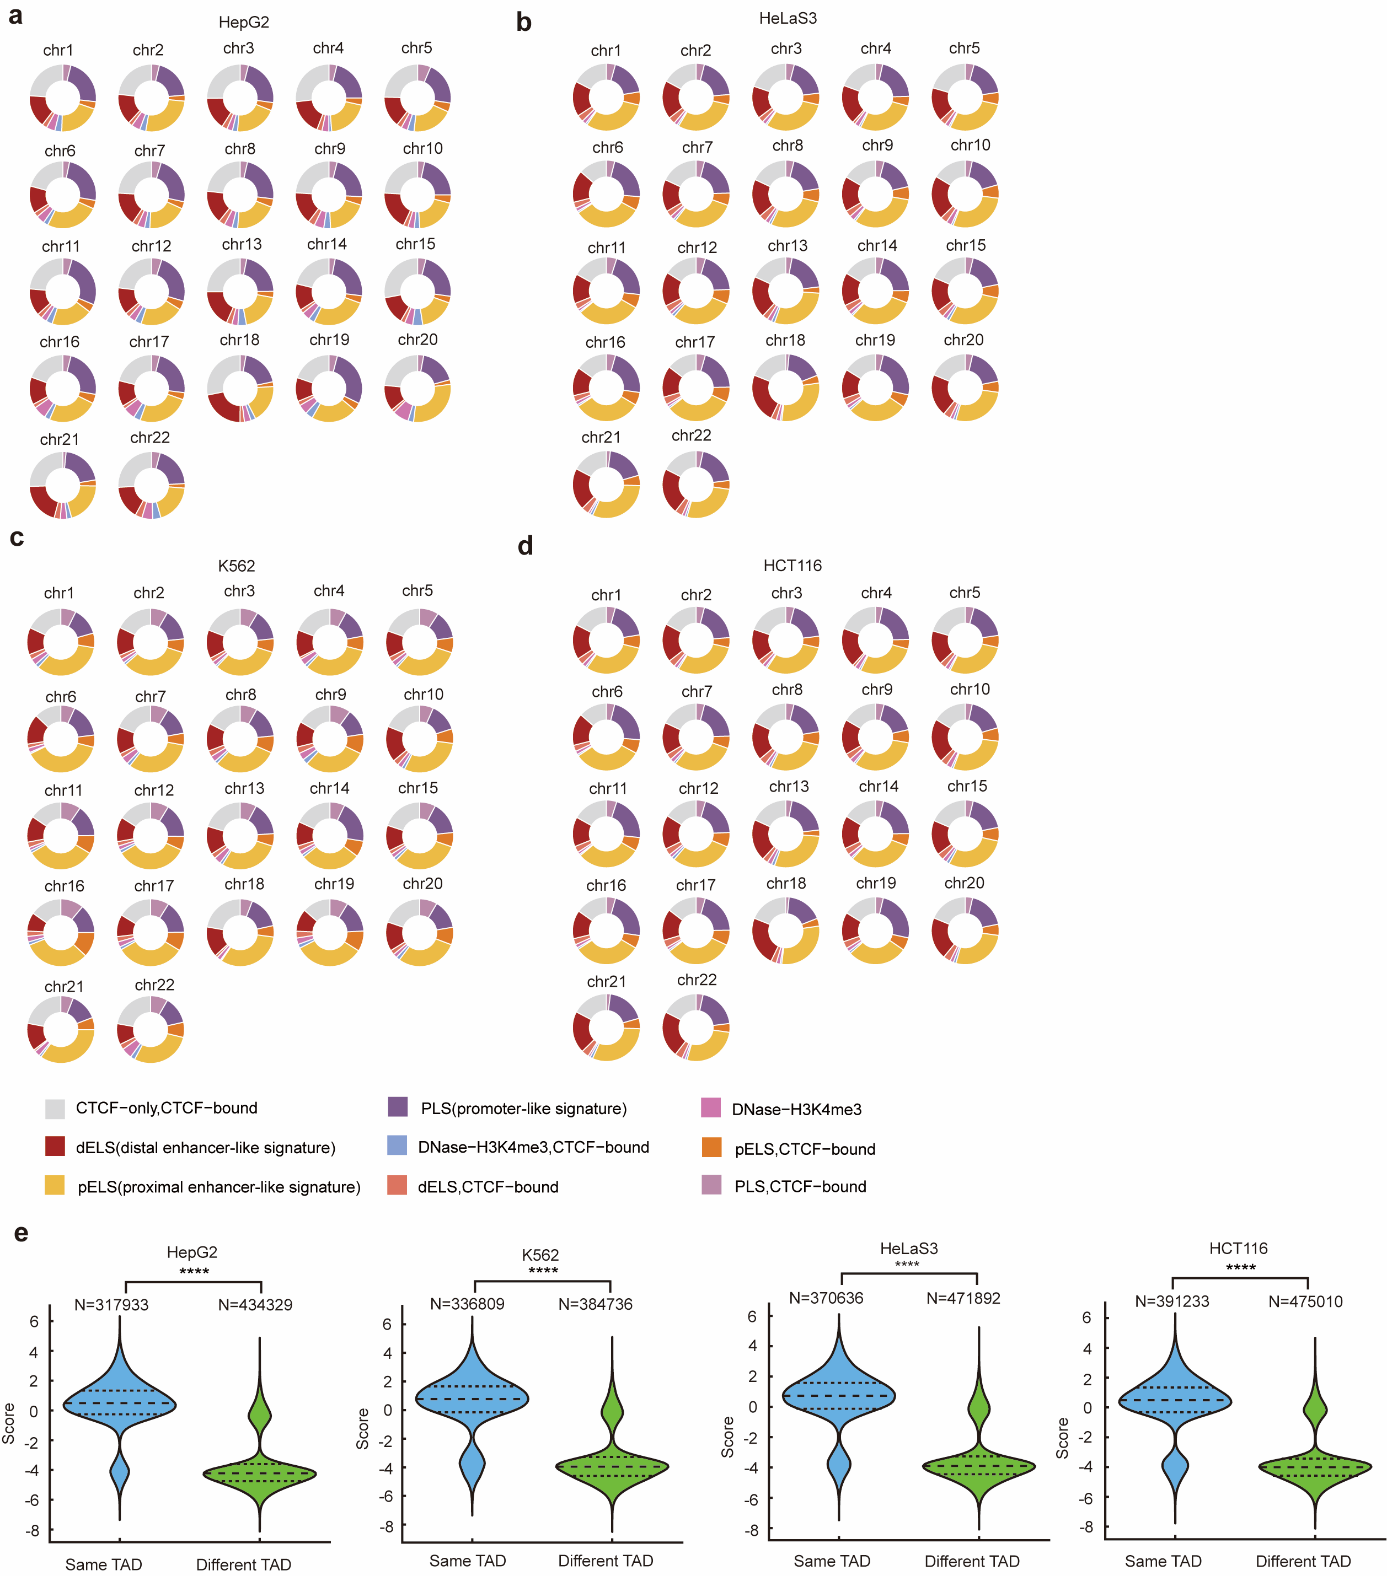


**Supplementary Fig. S3 |** **DeepCis's ability to capture different cCREs.** **a-d** Distribution of the types of the top ten high-contribution elements for genes across chromosomes in the HepG2,K562,HeLaS3,HCT116 cell line. **e** Differences in the co-localization of genes and their top ten high-contribution elements within TADs in the HepG2,K562,HeLaS3,HCT116 cell line.


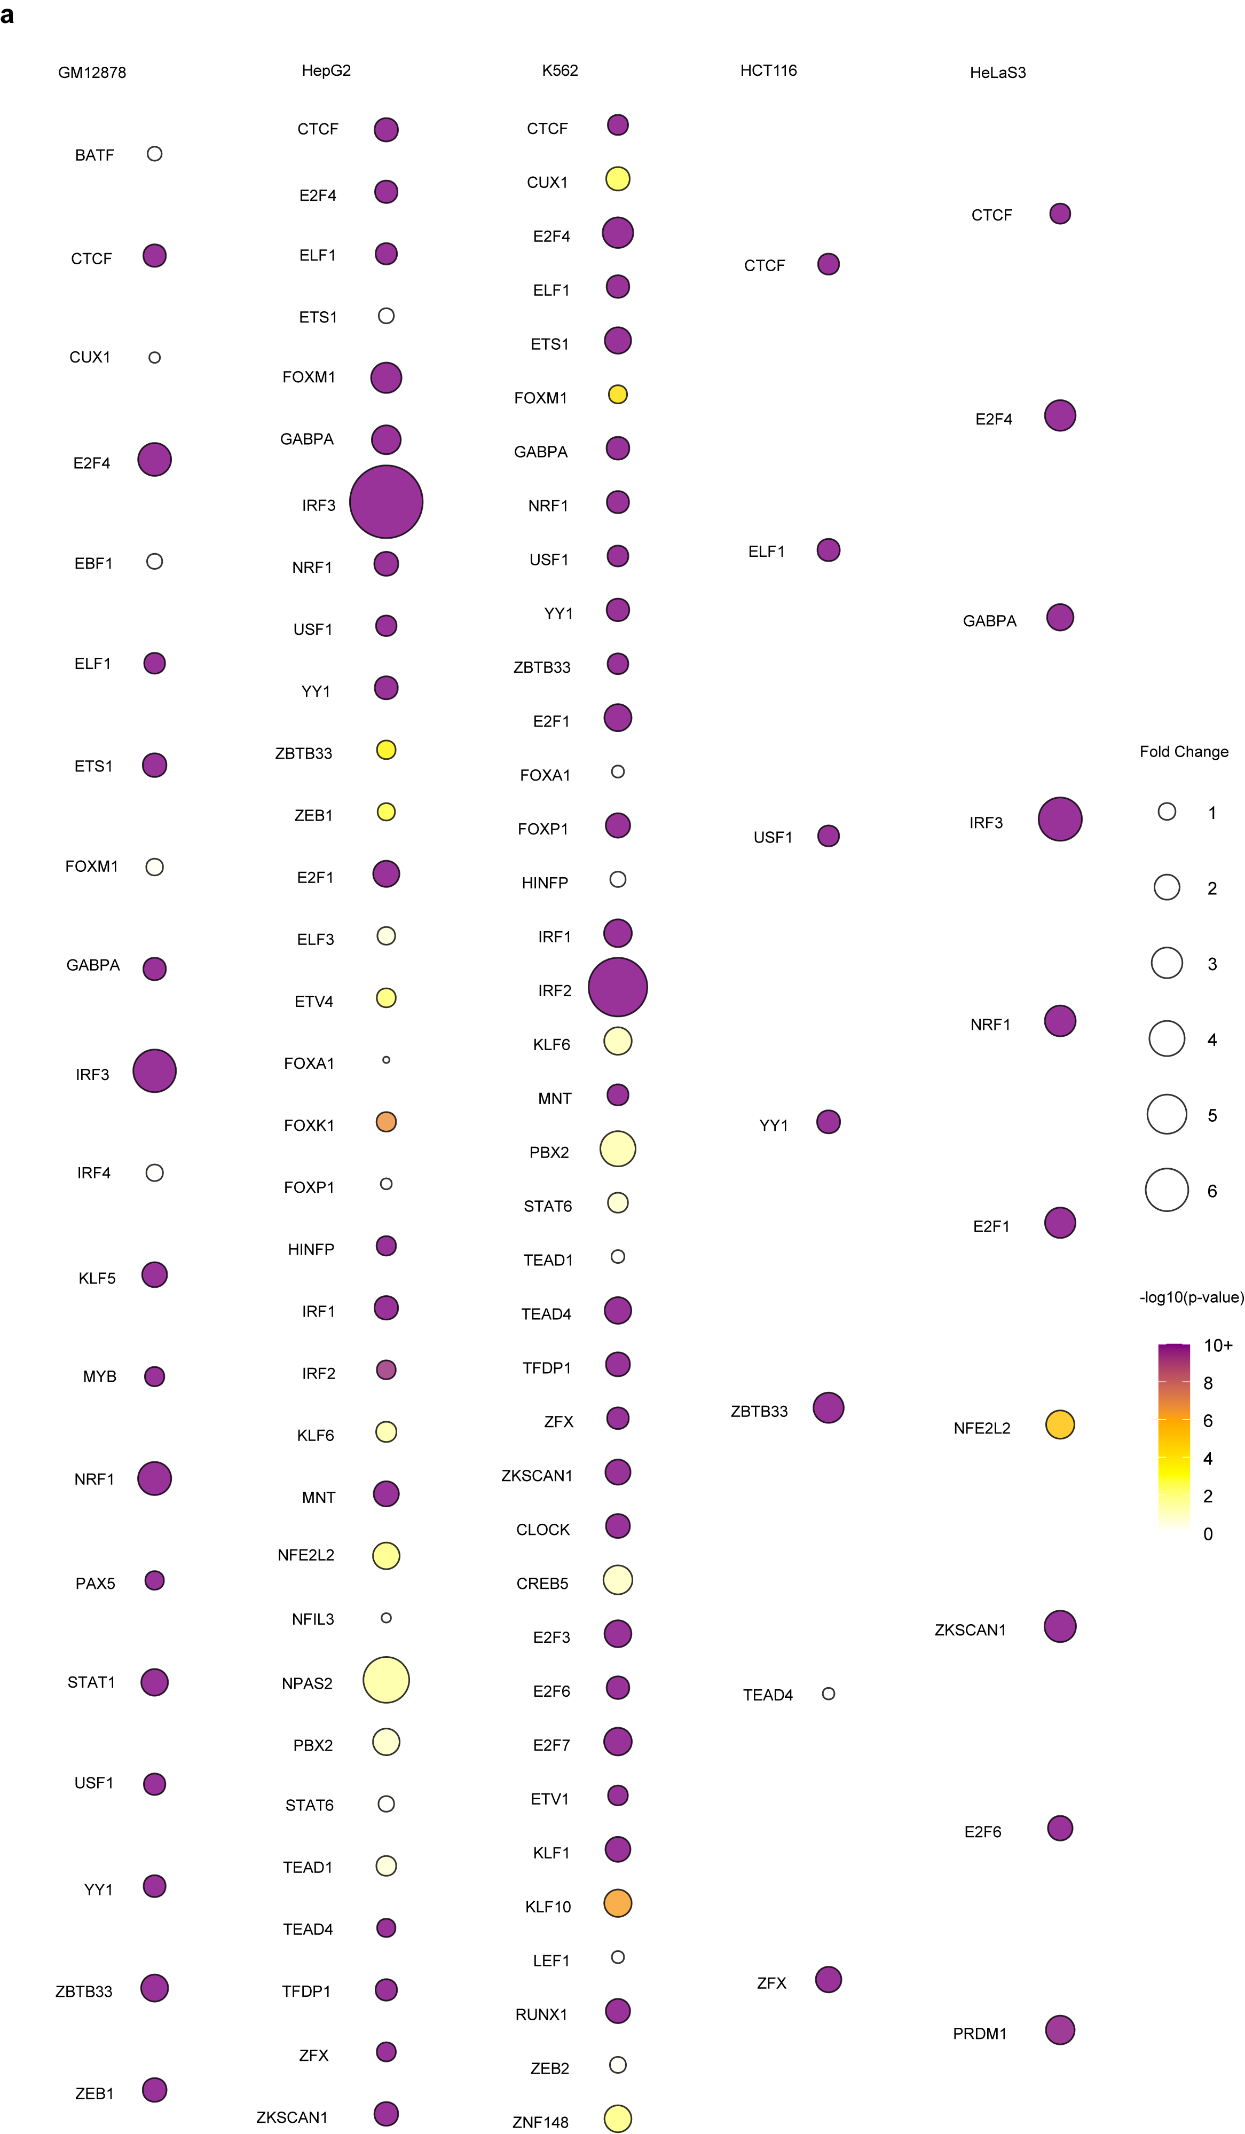


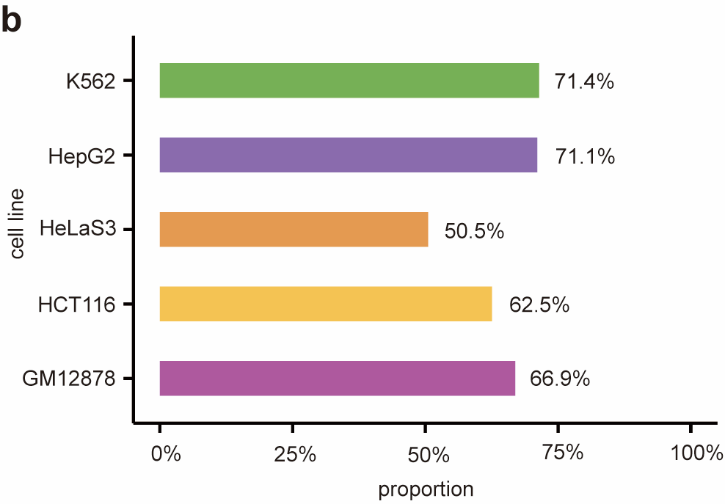


**Supplementary Fig. S4 | Enrichment analysis of transcription factor binding sites and validation of regulatory directionality. a** Enrichment analysis based on ChIP-seq data for 108 transcription factors across five cell lines and target gene information, showing the enrichment of DeepCis-predicted high RCSs with transcription factor binding sites on target genes. 87 transcription factors were significantly enriched in high regulatory contribution score elements. **b** Consistency between the predicted regulatory directionality of transcription factors and the correlation of transcription factor and target gene expression values from the TCGA database, with the x-axis representing the consistency proportion.

**Supplementary Table 2: Regulatory elements that are among the top 20 in frequency and overlap with known super-enhancers.**

| cell_line | chrom | start | start |
| --- | --- | --- | --- |
| GM12878 | chr1 | 203273110 | 203273110 |
| GM12878 | chr1 | 203289554 | 203289554 |
| GM12878 | chr1 | 156500747 | 156500747 |
| GM12878 | chr1 | 203273941 | 203273941 |
| GM12878 | chr1 | 150150047 | 150150047 |
| GM12878 | chr2 | 233060146 | 233060479 |
| GM12878 | chr2 | 233067602 | 233067948 |
| GM12878 | chr3 | 46979496 | 46979846 |
| GM12878 | chr3 | 46976416 | 46976602 |
| GM12878 | chr3 | 46976625 | 46976974 |
| GM12878 | chr3 | 46976980 | 46977149 |
| GM12878 | chr4 | 153466088 | 153466437 |
| GM12878 | chr4 | 184352251 | 184352477 |
| GM12878 | chr4 | 40190421 | 40190764 |
| GM12878 | chr4 | 40193244 | 40193590 |
| GM12878 | chr4 | 153471761 | 153472104 |
| GM12878 | chr4 | 184353577 | 184353778 |
| GM12878 | chr4 | 40190844 | 40191162 |
| GM12878 | chr4 | 184351989 | 184352244 |
| GM12878 | chr7 | 128938860 | 128939119 |
| GM12878 | chr7 | 102433288 | 102433638 |
| GM12878 | chr7 | 102433815 | 102434138 |
| GM12878 | chr8 | 11491918 | 11492266 |
| GM12878 | chr8 | 11501370 | 11501537 |
| GM12878 | chr8 | 11501547 | 11501869 |
| GM12878 | chr9 | 33167220 | 33167566 |
| GM12878 | chr9 | 33166789 | 33166972 |
| GM12878 | chr9 | 112028185 | 112028533 |
| GM12878 | chr10 | 72297960 | 72298301 |
| GM12878 | chr12 | 6937845 | 6938195 |
| GM12878 | chr12 | 6943988 | 6944336 |
| GM12878 | chr12 | 9719091 | 9719244 |
| GM12878 | chr12 | 6943696 | 6943911 |
| GM12878 | chr12 | 6944348 | 6944499 |
| GM12878 | chr12 | 6944546 | 6944893 |
| GM12878 | chr13 | 99307266 | 99307610 |
| GM12878 | chr13 | 46182078 | 46182427 |
| GM12878 | chr13 | 99307783 | 99308117 |
| GM12878 | chr13 | 46182476 | 46182679 |
| GM12878 | chr13 | 46181880 | 46182071 |
| GM12878 | chr13 | 99308133 | 99308327 |
| GM12878 | chr13 | 99306449 | 99306735 |
| GM12878 | chr13 | 99299640 | 99299841 |
| GM12878 | chr14 | 22482950 | 22483298 |
| GM12878 | chr14 | 22484160 | 22484489 |
| GM12878 | chr14 | 22483585 | 22483878 |
| GM12878 | chr14 | 22556330 | 22556680 |
| GM12878 | chr14 | 22490583 | 22490928 |
| GM12878 | chr14 | 22509229 | 22509529 |
| GM12878 | chr14 | 22492670 | 22492921 |
| GM12878 | chr14 | 22492170 | 22492322 |
| GM12878 | chr14 | 22482081 | 22482431 |
| GM12878 | chr14 | 22533295 | 22533611 |
| GM12878 | chr14 | 22510637 | 22510987 |
| GM12878 | chr14 | 22481688 | 22481894 |
| GM12878 | chr14 | 22509983 | 22510328 |
| GM12878 | chr14 | 22491041 | 22491259 |
| GM12878 | chr14 | 73760107 | 73760431 |
| GM12878 | chr17 | 16971972 | 16972318 |
| GM12878 | chr17 | 58332441 | 58332790 |
| GM12878 | chr18 | 58539053 | 58539266 |
| GM12878 | chr18 | 58538662 | 58538845 |
| GM12878 | chr18 | 58533378 | 58533668 |
| GM12878 | chr18 | 58533063 | 58533264 |
| GM12878 | chr18 | 58540496 | 58540668 |
| GM12878 | chr18 | 58535283 | 58535630 |
| GM12878 | chr18 | 58539705 | 58539932 |
| GM12878 | chr18 | 58533869 | 58534070 |
| GM12878 | chr22 | 22928712 | 22929062 |
| GM12878 | chr22 | 22935615 | 22935965 |
| HCT116 | chr1 | 1308334 | 1308678 |
| HCT116 | chr1 | 42924194 | 42924544 |
| HCT116 | chr3 | 50237919 | 50238269 |
| HCT116 | chr4 | 1721256 | 1721585 |
| HCT116 | chr6 | 31795647 | 31795838 |
| HCT116 | chr8 | 144078756 | 144078972 |
| HCT116 | chr8 | 144326736 | 144327085 |
| HCT116 | chr8 | 29350649 | 29350986 |
| HCT116 | chr9 | 128689460 | 128689666 |
| HCT116 | chr10 | 72297960 | 72298301 |
| HCT116 | chr10 | 102642099 | 102642449 |
| HCT116 | chr10 | 72319585 | 72319933 |
| HCT116 | chr17 | 44219851 | 44220167 |
| HCT116 | chr17 | 42678067 | 42678279 |
| HCT116 | chr20 | 63627359 | 63627544 |
| HCT116 | chr20 | 63627005 | 63627352 |
| HepG2 | chr4 | 39458574 | 39458799 |
| HepG2 | chr4 | 6909318 | 6909594 |
| HepG2 | chr12 | 54280025 | 54280375 |
| HepG2 | chr14 | 73787067 | 73787352 |
| HepG2 | chr14 | 21269564 | 21269892 |
| HepG2 | chr17 | 42536491 | 42536840 |
| K562 | chr1 | 203289554 | 203289904 |
| K562 | chr3 | 46979496 | 46979846 |
| K562 | chr3 | 46976416 | 46976602 |
| K562 | chr3 | 46976625 | 46976974 |
| K562 | chr3 | 46976980 | 46977149 |
| K562 | chr6 | 28896860 | 28897010 |
| K562 | chr6 | 28897015 | 28897336 |
| K562 | chr6 | 30687224 | 30687574 |
| K562 | chr6 | 28895543 | 28895893 |
| K562 | chr6 | 32175977 | 32176327 |
| K562 | chr6 | 28923817 | 28924166 |
| K562 | chr6 | 31834757 | 31835089 |
| K562 | chr6 | 28896196 | 28896545 |
| K562 | chr6 | 28866450 | 28866800 |
| K562 | chr6 | 32178412 | 32178615 |
| K562 | chr6 | 32178694 | 32178979 |
| K562 | chr6 | 28923150 | 28923452 |
| K562 | chr7 | 151028587 | 151028927 |
| K562 | chr10 | 72297960 | 72298301 |
| K562 | chr10 | 73246852 | 73247136 |
| K562 | chr11 | 809473 | 809730 |
| K562 | chr11 | 810132 | 810405 |
| K562 | chr11 | 809734 | 810060 |
| K562 | chr12 | 54359104 | 54359454 |
| K562 | chr12 | 123388698 | 123389036 |
| K562 | chr12 | 56688180 | 56688529 |
| K562 | chr12 | 54280025 | 54280375 |
| K562 | chr14 | 73760107 | 73760431 |
| K562 | chr14 | 73759905 | 73760057 |
| K562 | chr14 | 73787067 | 73787352 |
| K562 | chr14 | 73713789 | 73714139 |
| K562 | chr14 | 73787368 | 73787523 |
| K562 | chr14 | 73760467 | 73760642 |
| K562 | chr16 | 28823467 | 28823816 |
| K562 | chr16 | 28823854 | 28824204 |
| K562 | chr17 | 58332441 | 58332790 |
| K562 | chr17 | 28728855 | 28729148 |
| K562 | chr17 | 58337989 | 58338339 |
| K562 | chr20 | 35742250 | 35742600 |
| K562 | chr20 | 35742666 | 35742843 |
| K562 | chr22 | 21641986 | 21642335 |
| K562 | chr22 | 20021281 | 20021491 |
| K562 | chr22 | 20507360 | 20507710 |
| K562 | chr22 | 20117539 | 20117774 |
| K562 | chr22 | 21629927 | 21630277 |
| K562 | chr22 | 20117853 | 20118201 |
| K562 | chr22 | 20917144 | 20917494 |
| K562 | chr22 | 19432247 | 19432597 |
| K562 | chr22 | 21642445 | 21642623 |
| K562 | chr22 | 20917582 | 20917750 |
